# Supplementary material
Source: publisher figshare collection journal article supplement (https://plos.figshare.com/ndownloader/files/31078767)
Supplement: Supplementary file [file 31078767]

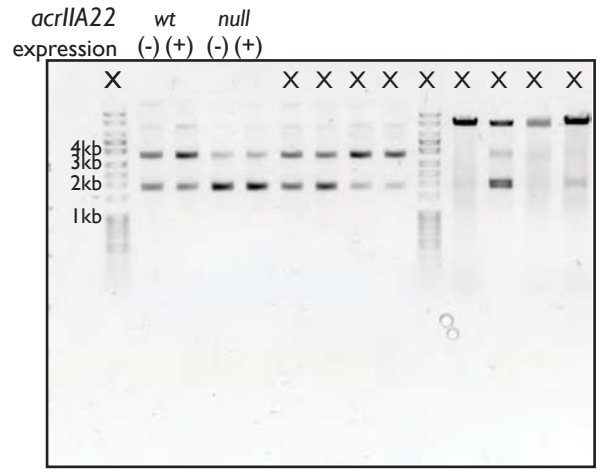

Figure 5A

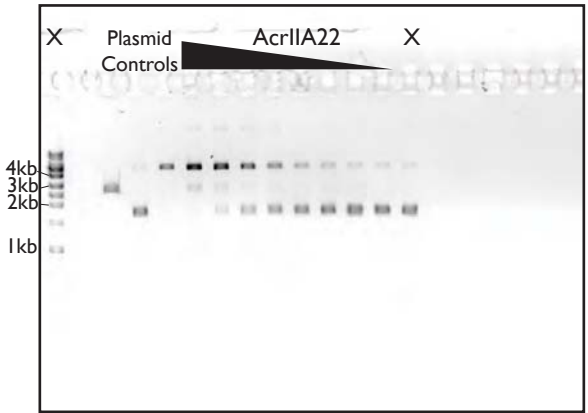

Figure 5B

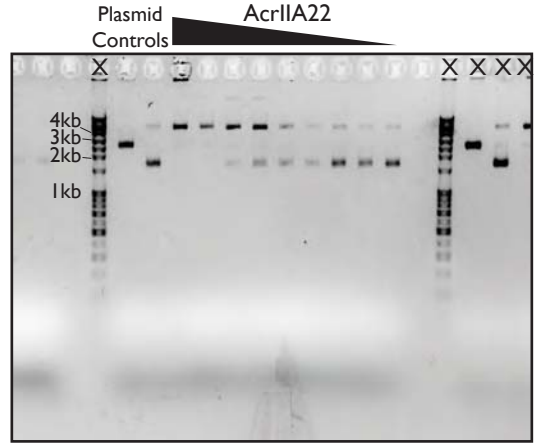

Figure 5C

X=lane not included in final figure (a marker, unused or redundant sample, or unrelated experiment)

These uncropped images appear cropped on occasion. This false crop effect results from the original camera zoom rather than any post-processing. The black borders were added to images to distinguish them from the white background. All images were captured in a Biorad geldoc and are EtBr DNA gels.

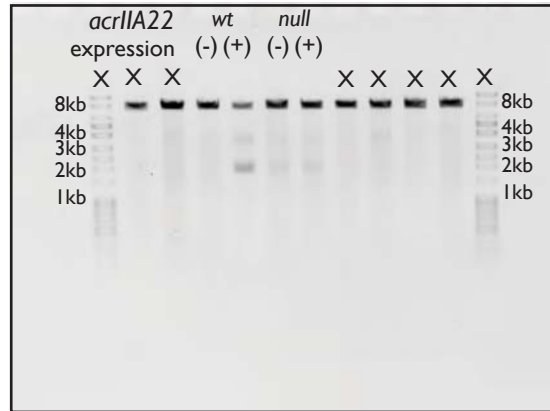

Figure 7A

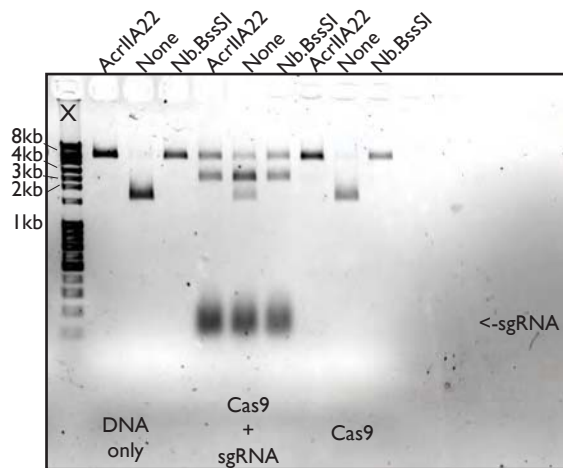

Figure 7C

X=lane not included in final figure (a marker, unused or redundant sample, or unrelated experiment)

The black borders were added to images to distinguish them from the white background. All images were captured in a Biorad geldoc and are EtBr DNA gels.

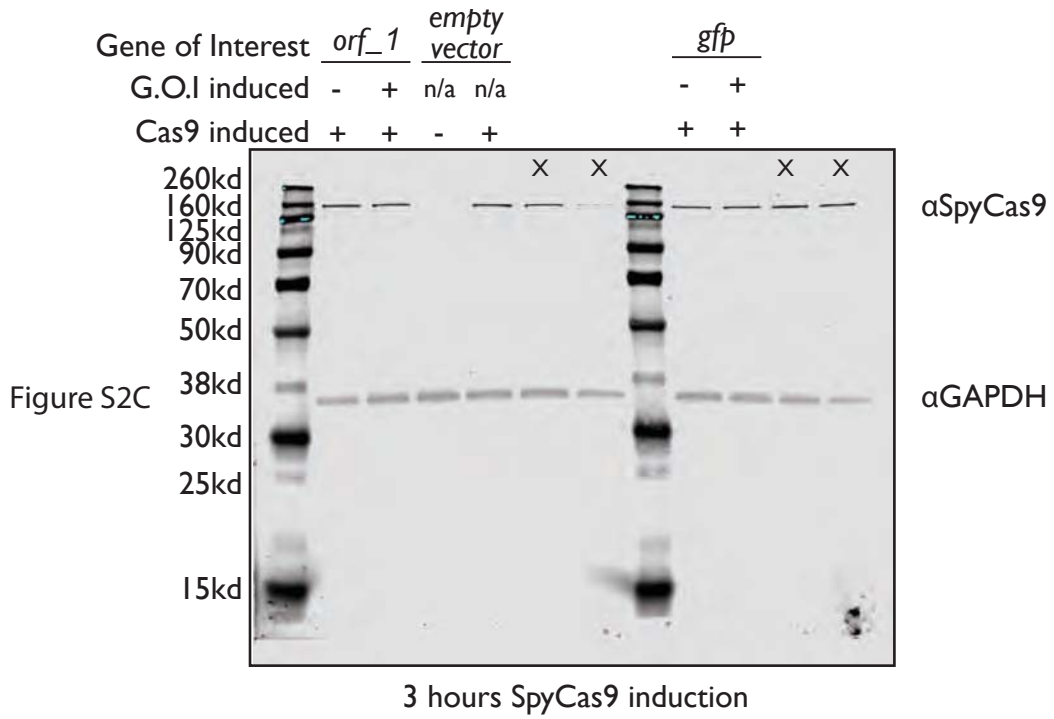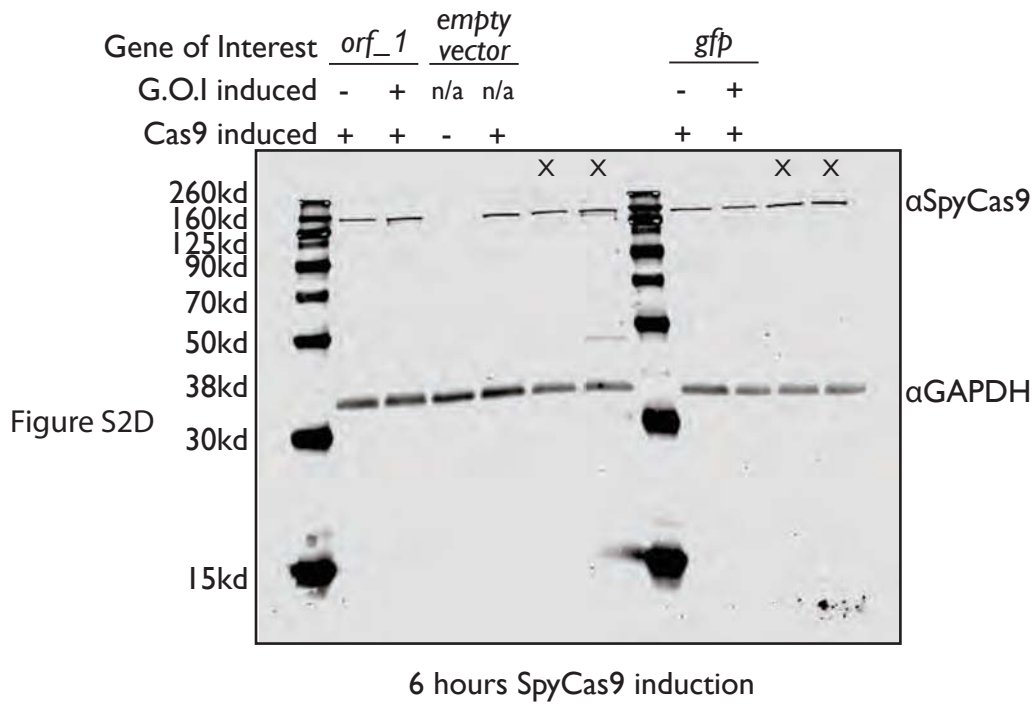

X=lane not included in final figure (a marker, unused or redundant sample, or unrelated experiment)

The black borders were added to images to distinguish them from the white background. All images were captured following a Western blot using a LiCor Odyssey Imager

Figure S6

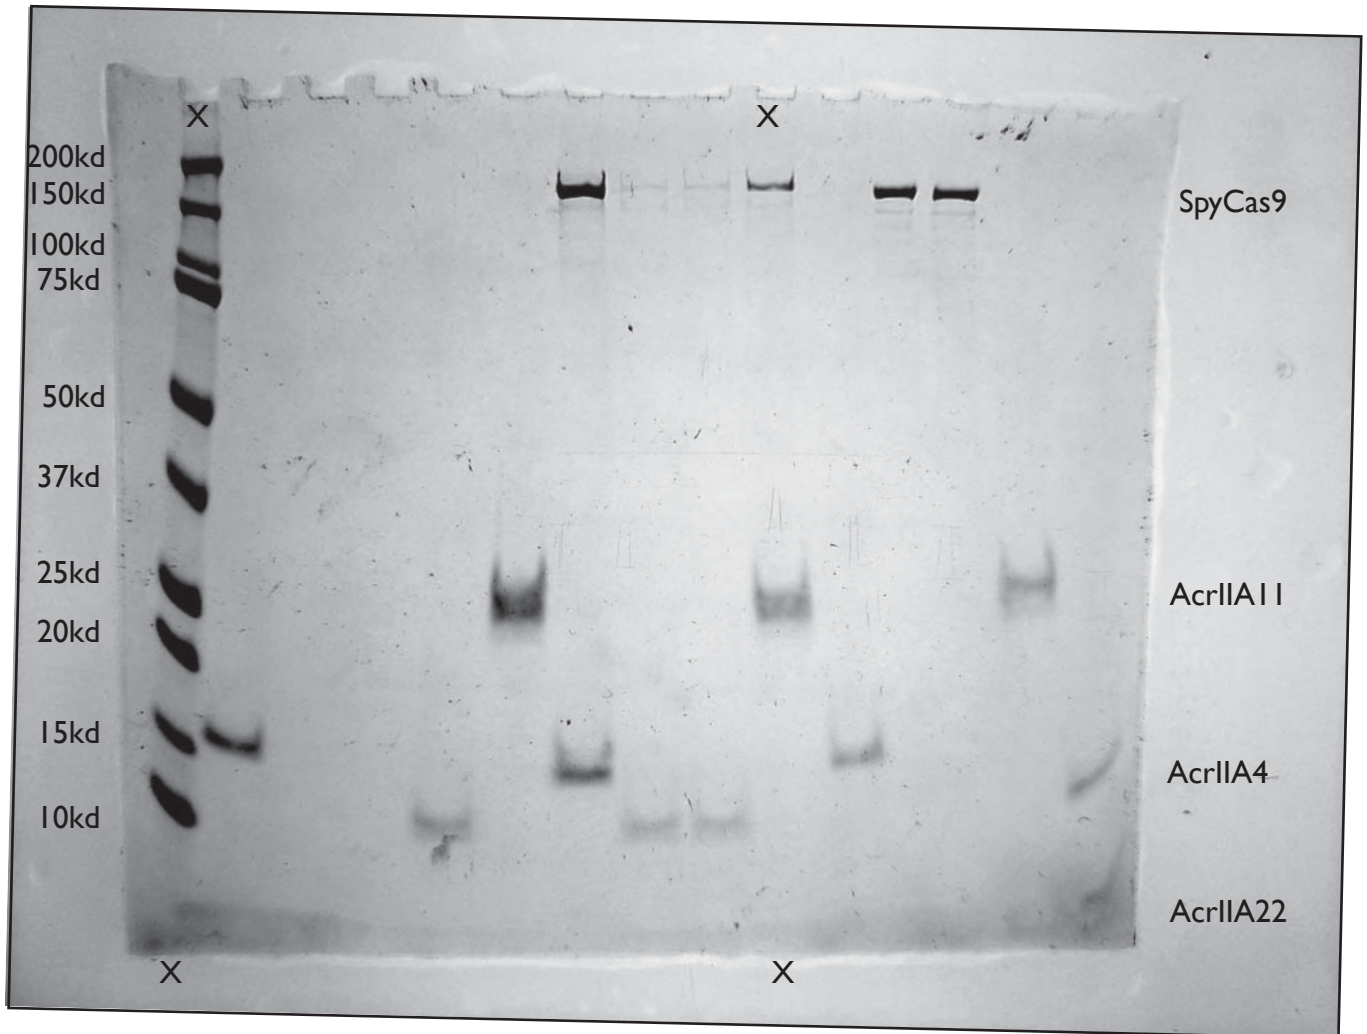

|             |   |   |   |   |   |   |   |   |   |   |   |   |   |
|-------------|---|---|---|---|---|---|---|---|---|---|---|---|---|
| AcrIIA22-TS | - | - | - | + | - | - | + | + | - | - | - | - | + |
| AcrIIA4-TS  | + | - | - | - | - | + | - | - | + | - | - | - | - |
| SpyCas9     | - | + | + | - | - | + | + | + | - | + | + | - | - |
| sgRNA       | - | + | - | - | - | + | + | - | - | + | - | - | - |

AcrIIA1 I bands omitted from figure S6 for clarity

X=lane not included in final figure (a marker, unused or redundant sample, or unrelated experiment)

The black border was added to images to distinguish it from the white background.  
All images were captured via a cell phone camera following a Coomassie protein stain

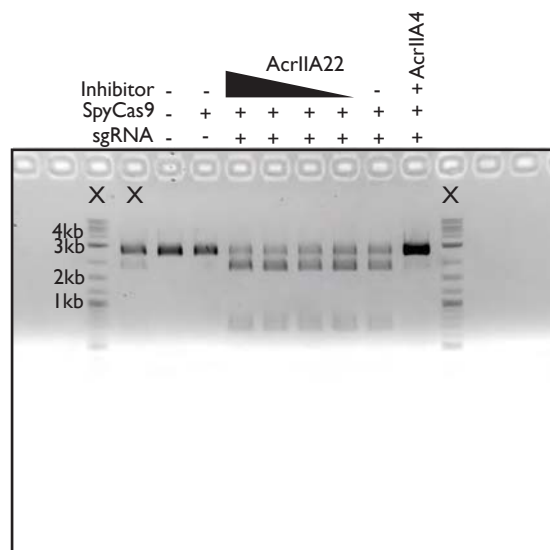

Figure S7B

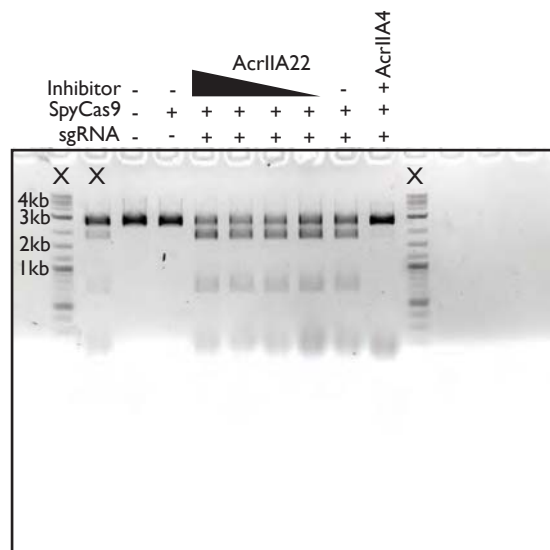

Figure S7D

X=lane not included in final figure (a marker, unused or redundant sample, or unrelated experiment)

These uncropped images appear cropped on occasion. This false crop effect results from the original camera zoom rather than any post-processing. The black borders were added to images to distinguish them from the white background. All images were captured in a Biorad geldoc and are EtBr DNA gels.

Figure S10A  
(and part of S10B)

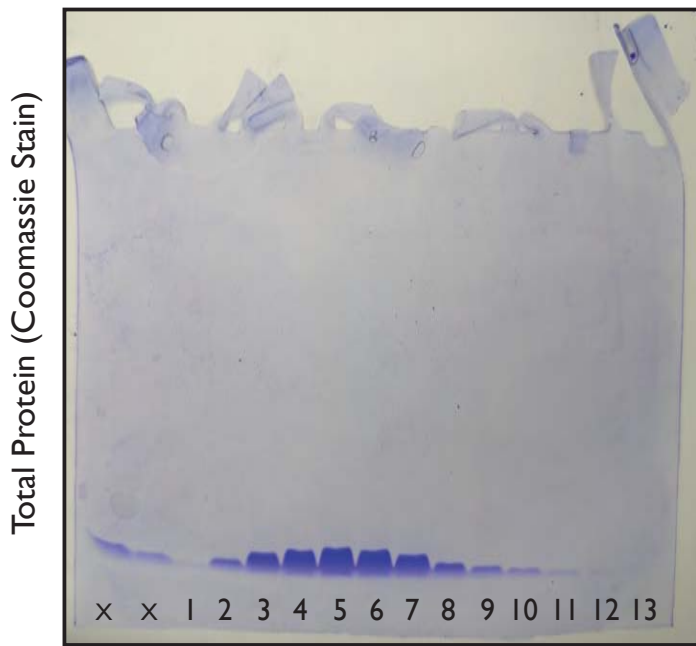

Figure S10B

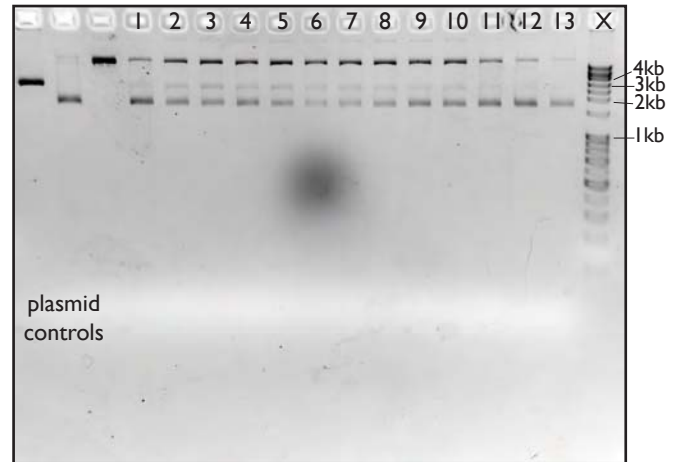

Figure S10E

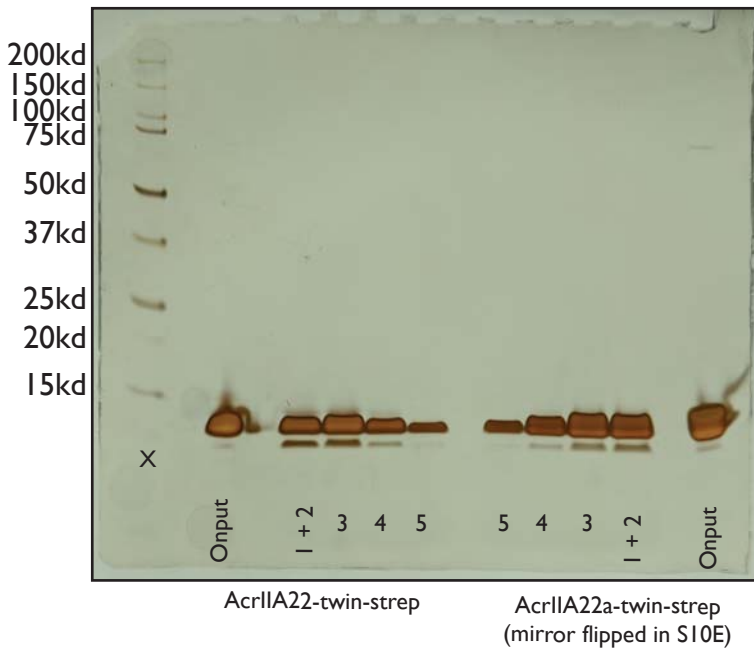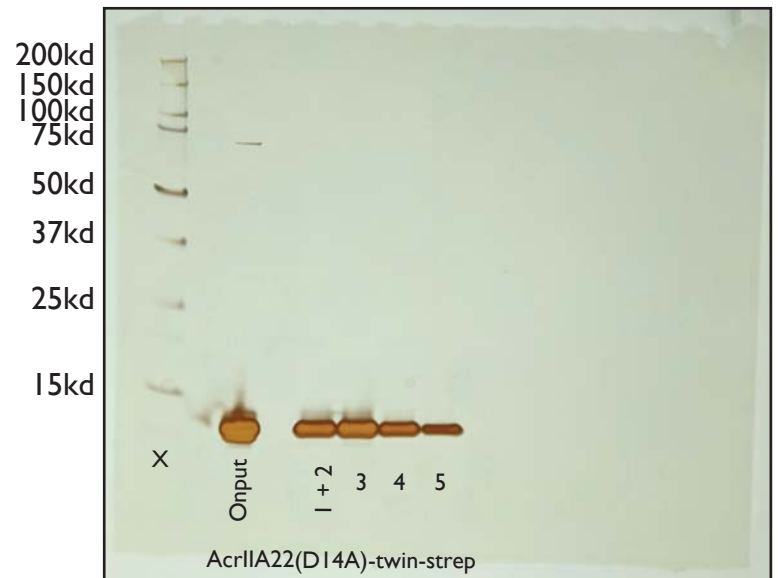

X=lane not included in final figure (a marker, unused or redundant sample, or unrelated experiment)

These uncropped images appear cropped on occasion. This false crop effect results from the original camera zoom rather than any post-processing. The black borders were added to images to distinguish them from the white background. Images were captured as follows:

- (A) Cell phone camera + Coomassie Stain
- (B) EtBr DNA Gel + BioRad Geldoc Imager
- (E) Cell phone camera + Silver Stain

Figure S10E shows panels from three samples across two gels, as shown.

Figure S10G

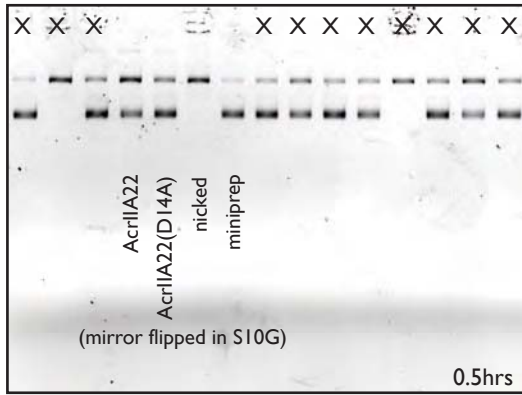

Figure S10H

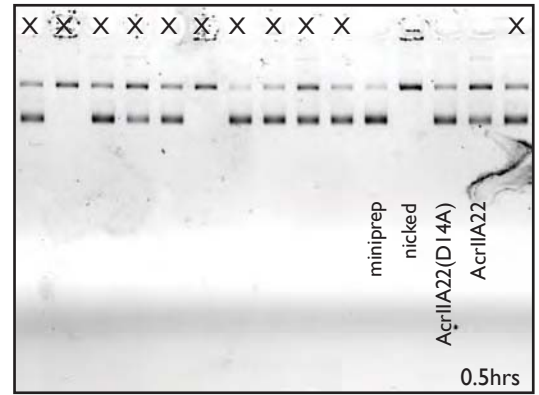

Figure S10G

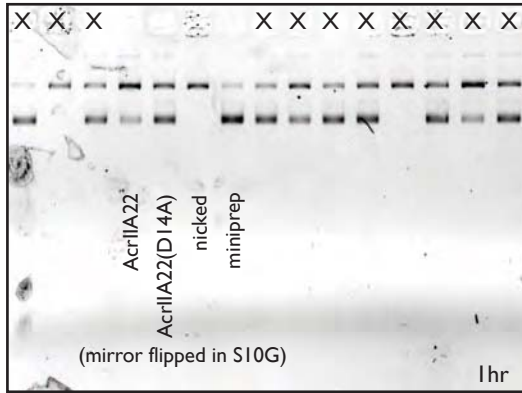

Figure S10H

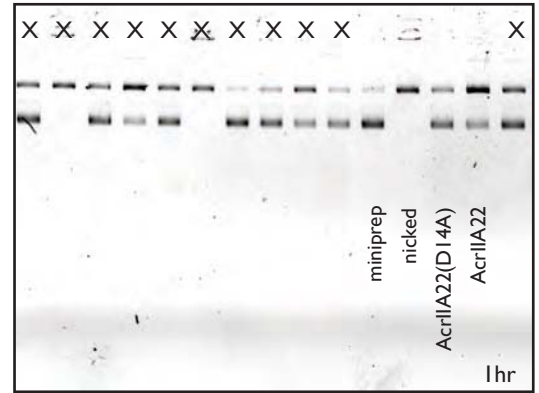

Figure S10G

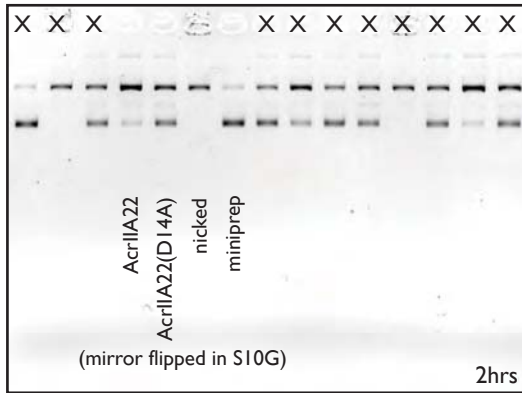

Figure S10H

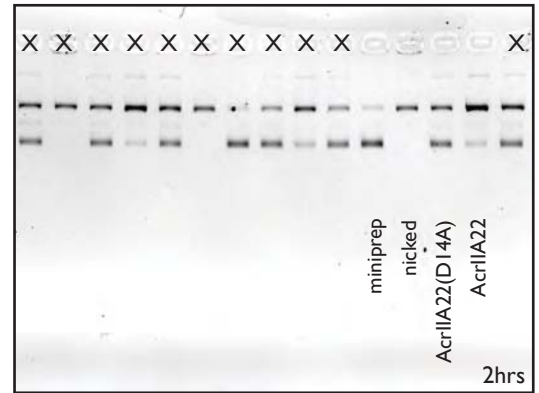

Figure S10G

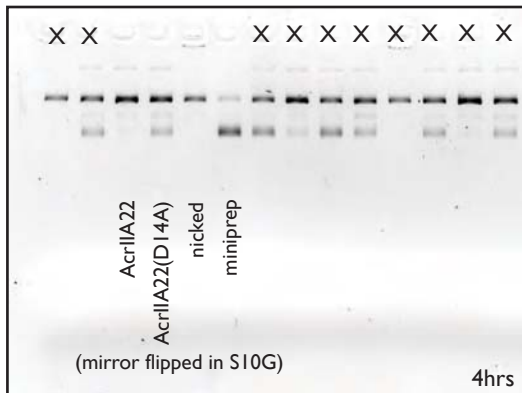

Figure S10H

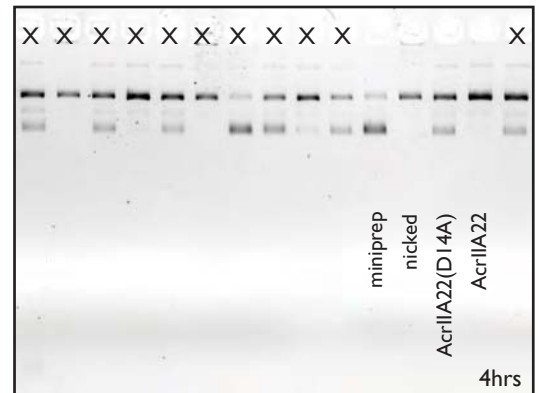

X=lane not included in final figure (a marker, unused or redundant sample, or unrelated experiment)

These uncropped images appear cropped on occasion. This false crop effect results from the original camera zoom rather than any post-processing. The black borders were added to images to distinguish them from the white background. All images were captured in a Biorad geldoc and are EtBr DNA gels.
